# Supplementary material
Source: Elsevier journal article supplement (https://usiena-air.unisi.it/retrieve/c0c4464a-566c-42ab-b470-4d76016f4a81/mmc3.pdf)
Supplement: mmc3 [file mmc3.pdf]

MuSC study group

| Name                         | Affiliation                                                                                                                                                                                |
|------------------------------|--------------------------------------------------------------------------------------------------------------------------------------------------------------------------------------------|
| Abbadessa Gianmarco          | Department of Advanced Medical and Surgical Sciences, University of Campania Luigi Vanvitelli, 80138 Naples, Italy;                                                                        |
| Aguglia Umberto              | Department of medical and surgical sciences, Magna Graecia University Catanzaro                                                                                                            |
| Allegorico Lia               | Multiple Sclerosis Centre A. Cardarelli Hospital, Naples, Italy                                                                                                                            |
| Allegrì Rossi Beatrice Maria | Centro SM Fidenza (PR)                                                                                                                                                                     |
| Alteno Anastasia             | MS Center, Department of Neuroscience, City of Health and Science University Hospital of Turin, Turin, Italy                                                                               |
| Amato Maria Pia              | Università degli Studi di Firenze, Dipartimento NEUROFARBA, Firenze - IRCCS Fondazione Don Carlo Gnocchi, Firenze                                                                          |
| Annovazzi Pietro             | Centro Sclerosi Multipla Ospedale di Gallarate, ASST della Valle Olona                                                                                                                     |
| Antozzi Carlo                | Centro Sclerosi Multipla, U.O Neurologia IV, Fondazione IRCCS Istituto Neurologico "Carlo Besta", Milano                                                                                   |
| Appendino Lucia              | SC Neurologia1 Ospedale Maria Vittoria- Torino                                                                                                                                             |
| Arena Sebastiano             | Dipartimento Scienze Mediche e Chirurgiche e Tecnologie Avanzate, GF Ingrassia, Università di Catania; Centro Sclerosi Multipla Policlinico "G Rodolico"- San Marco, Università di Catania |
| Baione Viola                 | Department of Human Neurosciences, Sapienza, University of Rome                                                                                                                            |
| Balgera Roberto              | MS Center, ASST Lecco                                                                                                                                                                      |
| Barcella Valeria             | USS Neuroimmunologia, ASST Papa Giovanni XXIII                                                                                                                                             |
| Baroncini Damiano            | Centro Sclerosi Multipla Ospedale di Gallarate, ASST della Valle Olona                                                                                                                     |
| Barrilà Caterina             | ASST Rhodense                                                                                                                                                                              |
| Battaglia Mario A.           | 1. Research Department, Italian Multiple Sclerosis Foundation, Genoa, Italy.<br>2. Department of Life Sciences, University of Siena, Siena, Italy.                                         |
| Bellacosa Alessandra         | Centro Sclerosi Multipla, UO Neurologia, Ospedale San Giacomo, Monopoli (Bari)                                                                                                             |
| Bellucci Gianmarco           | Department of Neuroscience, Mental Health and Sensory Organs Sapienza University S. Andrea Hospital-site Rome                                                                              |
| Bergamaschi Roberto          | IRCCS Mondino Foundation, Pavia                                                                                                                                                            |
| Bergamaschi Valeria          | AISM Rehabilitation Service Liguria                                                                                                                                                        |
| Bezzini Daiana               | Department of Life Sciences, University of Siena, Siena, Italy                                                                                                                             |
| Biolzi Beatrice              | Centro SM Fidenza (PR)                                                                                                                                                                     |
| Bisecco Alvino               | Centro SM, I Clinica Neurologica, AOU-Policlinico, Università della Campania "Luigi Vanvitelli"                                                                                            |
| Bonavita Simona              | Department of Advanced Medical and Surgical Sciences, University of Campania Luigi Vanvitelli, 80138 Naples, Italy;                                                                        |
| Borriello Giovanna           | NCL Istituto di Neuroscienze Roma                                                                                                                                                          |
| Bosa Chiara                  | MS Center, Department of Neuroscience, City of Health and Science University Hospital of Turin, Turin, Italy                                                                               |
| Bosco Antonio                | Neurology Unit, Department of Medical, Surgical, and Health Sciences, Cattinara University Hospital, ASUGI, Trieste                                                                        |
| Bovis Francesca              | Department of Health Sciences, University of Genoa, Genoa, Italy.                                                                                                                          |
| Bozzali Marco                | Neurology II, Dept of Neuroscience, University of Turin                                                                                                                                    |
| Brambilla Laura              | Centro Sclerosi Multipla, U.O Neurologia IV, Fondazione IRCCS Istituto Neurologico "Carlo Besta", Milano                                                                                   |
| Brescia Morra Vincenzo       | Federico II University of Naples                                                                                                                                                           |
| Brichetto Giampaolo          | AISM Rehabilitation Service Liguria                                                                                                                                                        |

MuSC study group

|                        |                                                                                                                                                                                            |
|------------------------|--------------------------------------------------------------------------------------------------------------------------------------------------------------------------------------------|
| Buccafusca Maria       | Centro Sclerosi Multipla UOC Neurologia e Malattie Neuromuscolari, AOU Policlinico G. Martino Messina                                                                                      |
| Bucciantini Elisabetta | Ospedale Savigliano ASLCN1                                                                                                                                                                 |
| Bucello Sebastiano     | Centro SM Ospedale Muscatello Augusta (ASP8 SR)                                                                                                                                            |
| Buscarinu Maria Chiara | Department of Neuroscience, Mental Health and Sensory Organs Sapienza University S. Andrea Hospital-site Rome                                                                              |
| Cabboi Maria Paola     | UOC Neurologia- centro SM- AUSL- IRCCS RE                                                                                                                                                  |
| Calabrese Massimiliano | The Multiple Sclerosis Center of University Hospital of Verona Dept. of Neuroscience, Biomedicine and Movements                                                                            |
| Calabria Francesca     | Division of Neurology, university Hospital, Verona, Italy                                                                                                                                  |
| Caleri Francesca       | Multiple Sclerosis Center, Department of Neurology - Franz Tappeiner Hospital Meran (BZ), Italy                                                                                            |
| Camilli Federico       | IRCCS Istituto delle Scienze Neurologiche di Bologna, UOSI Riabilitazione Sclerosi Multipla                                                                                                |
| Caniatti Luisa Maria   | Centro sclerosi Multipla azienda ospedaliera universitaria S. Anna, Ferrara                                                                                                                |
| Cantello Roberto       | Neurology Unit, Maggiore della Carità Hospital, Department of Translational Medicine, University of Piemonte Orientale, Novara, Italy                                                      |
| Capobianco Marco       | SCDO Neurologia e Centro di Riferimento Regionale Sclerosi Multipla, AOU San Luigi - Orbassano (TO)                                                                                        |
| Capra Ruggero          | Centro Sclerosi Multipla ASST Spedali Civili di Brescia, Ospedale di Montichiari                                                                                                           |
| Capuano Rocco          | Centro SM, I Clinica Neurologica, AOU-Policlinico, Università della Campania "Luigi Vanvitelli"                                                                                            |
| Carmisciano Luca       | Department of Health Sciences, University of Genoa, Genoa, Italy.                                                                                                                          |
| Carta Patrizia         | Centro Sclerosi Multipla Ospedale di Gallarate, ASST della Valle Olona                                                                                                                     |
| Cavalla Paola          | MS Center, Department of Neuroscience, City of Health and Science University Hospital of Turin, Turin, Italy                                                                               |
| Celani Maria Grazia    | Azienda Ospedaliera di Perugia, SC di Neurofisiopatologia                                                                                                                                  |
| Cellerino Maria        | DINOEMI Università di Genova                                                                                                                                                               |
| Cerqua Raffaella       | Clinica Neurologica Ospedali Riuniti Ancona                                                                                                                                                |
| Chisari Clara          | Dipartimento Scienze Mediche e Chirurgiche e Tecnologie Avanzate, GF Ingrassia, Università di Catania; Centro Sclerosi Multipla Policlinico "G Rodolico"- San Marco, Università di Catania |
| Clerici Raffaella      | Centro Sclerosi Multipla U.O. Neurologia Ospedale Valduce Como                                                                                                                             |
| Clerico Marinella      | Clinical and Biological Sciences Dept, University of Torino                                                                                                                                |
| Cocco Eleonora         | Centro Sclerosi Multipla, ATS Sardegna/ Dpt Scienze Mediche e Sanità Pubblica, Università di Cagliari, Cagliari                                                                            |
| Cola Gaia              | Multiple Sclerosis Clinical and Research Unit, Department of Systems Medicine, Tor Vergata University, Rome, Italy                                                                         |
| Comi Giancarlo         | Institute of Experimental Neurology, IRCCS Ospedale San Raffaele, Milan, Italy.                                                                                                            |
| Confalonieri Paolo     | Centro Sclerosi Multipla, U.O Neurologia IV, Fondazione IRCCS Istituto Neurologico "Carlo Besta", Milano                                                                                   |
| Conte Antonella        | 1) Department of Human Neurosciences, Sapienza, University of Rome. 2) IRCCS Neuromed, Pozzilli (IS)                                                                                       |
| Conti Marta Zaffira    | USS Neuroimmunologia, ASST Papa Giovanni XXIII                                                                                                                                             |
| Cordano Christian      | UCSF, San Francisco, USA                                                                                                                                                                   |
| Cordera Susanna        | SC Neurologia Ausl Valle D' Aosta                                                                                                                                                          |
| Cordioli Cinzia        | Centro Sclerosi Multipla ASST Spedali Civili di Brescia, Ospedale di Montichiari                                                                                                           |
| Corea Francesco        | Neurologia, Ospedale San Giovanni, Foligno                                                                                                                                                 |
| Correale Claudio       | AIMS Vicenza Rehabilitation Service                                                                                                                                                        |

MuSC study group

|                               |                                                                                                                                                                                            |
|-------------------------------|--------------------------------------------------------------------------------------------------------------------------------------------------------------------------------------------|
| Cottone Salvatore             | Centro Sclerosi Multipla U.O.C. Neurologia con Stroke Unit A.R.N.A.S Civico (Palermo)                                                                                                      |
| Crescenzo Francesco           | The Multiple Sclerosis Center of University Hospital of Verona Dept. of Neuroscience, Biomedicine and Movements                                                                            |
| Curti Erica                   | Multiple Sclerosis Centre, Department of General Medicine, Parma University Hospital, Parma                                                                                                |
| d'Ambrosio Alessandro         | Centro SM, I Clinica Neurologica, AOU-Policlinico, Università della Campania "Luigi Vanvitelli"                                                                                            |
| D'Amico Emanuele              | Dipartimento Scienze Mediche e Chirurgiche e Tecnologie Avanzate, GF Ingrassia, Università di Catania; Centro Sclerosi Multipla Policlinico "G Rodolico"- San Marco, Università di Catania |
| Danni Maura Chiara            | Clinica Neurologica Ospedali Riuniti Ancona                                                                                                                                                |
| d'Arma Alessia                | IRCCS Fondazione Don Carlo Gnocchi ONLUS, Milano                                                                                                                                           |
| Dattola Vincenzo              | UOC Neurologia, Grande Ospedale Metropolitano "Bianchi Melacrino Morelli", Reggio di Calabria                                                                                              |
| de Biase Stefano              | Neurology Unit, Ospedale dell'Angelo, Venezia-Mestre, Italy                                                                                                                                |
| De Luca Giovanna              | MS Centre, Department of Clinical Neurology, SS. Annunziata, University Hospital, Chieti, Italy                                                                                            |
| De Mercanti Stefania Federica | Clinical and Biological Sciences Dept, University of Torino                                                                                                                                |
| De Mitri Paolo                | Emergency Department, Guglielmo da Saliceto Hospital, Piacenza, Italy                                                                                                                      |
| De Rossi Nicola               | Centro Sclerosi Multipla ASST Spedali Civili di Brescia, Ospedale di Montichiari                                                                                                           |
| De Stefano Nicola             | Department of Medicine, Surgery and Neuroscience, University of Siena, Italy                                                                                                               |
| Della Cava Fabio Maria        | Asl1 Imperia, Neurologia                                                                                                                                                                   |
| Della Cava Marco              | AIMS Padova Rehabilitation Service                                                                                                                                                         |
| Di Lemme Sonia                | Neurology Unit, IRCCS Neuromed, Pozzilli, IS, Italy                                                                                                                                        |
| di Napoli Mario               | Centro Sclerosi Multipla Rieti (Rieti)                                                                                                                                                     |
| Di Sapio Alessia              | Department of Neurology, Regina Montis Regalis Hospital, Mondovì (CN)                                                                                                                      |
| Docimo Renato                 | Centro Sclerosi Multipla, Presidio Ospedaliero "San Giuseppe Moscati" " ASL Caserta, Aversa (CE).                                                                                          |
| Dutto Anna                    | Ospedale Savigliano Aslcn1                                                                                                                                                                 |
| Evangelista Luana             | Demyelinating Disease Center, San Salvatore Hospital, L'Aquila                                                                                                                             |
| Fanara Salvatore              | Department of Biomedicine, Neurosciences and Advanced Diagnostics; University of Palermo                                                                                                   |
| Fantozzi Roberta              | Neurology Unit, IRCCS Neuromed, Pozzilli, IS, Italy                                                                                                                                        |
| Ferraro Diana                 | Department of Biomedical, Metabolic and Neurosciences, University of Modena and Reggio Emilia, Modena, Italy                                                                               |
| Ferrò Maria Teresa            | Neuroimmunology, Center for Multiple Sclerosis, ASST, Crema, Italy                                                                                                                         |
| Filippi Massimo               | 1 Neuroimaging Research Unit, Institute of Experimental Neurology, Division of Neuroscience, IRCCS San Raffaele Scientific Institute, Milan, Italy                                         |
|                               | 2 Neurology Unit, IRCCS San Raffaele Scientific Institute, Milan, Italy                                                                                                                    |
|                               | 3 Neurorehabilitation Unit, IRCCS San Raffaele Scientific Institute, Milan, Italy                                                                                                          |
|                               | 4 Neurophysiology Unit, IRCCS San Raffaele Scientific Institute, Milan, Italy                                                                                                              |
|                               | 5 Vita-Salute San Raffaele University, Milan, Italy                                                                                                                                        |
| Fioretti Cristina             | UO Neurologia Livorno                                                                                                                                                                      |
| Fratte Mario                  | Il Clinica Neurologica, Università della Campania Luigi Vanvitelli, Naples                                                                                                                 |
| Frau Jessica                  | Centro Sclerosi Multipla, ATS Sardegna/ Dpt Scienze Mediche e Sanità Pubblica, Università di Cagliari, Cagliari                                                                            |
| Fronza Marzia                 | Centro Sclerosi Multipla, ATS Sardegna/ Dpt Scienze Mediche e Sanità Pubblica, Università di Cagliari, Cagliari                                                                            |

MuSC study group

|                        |                                                                                                                                                                                     |
|------------------------|-------------------------------------------------------------------------------------------------------------------------------------------------------------------------------------|
| Furlan Roberto         | Institute of Experimental Neurology, Division of Neuroscience, IRCCS Ospedale San Raffaele, Milano, Italy, and Italian Neuroimmunology Association-AINI                             |
| Gajofatto Alberto      | Dipartimento di Neuroscienze, Biomedicina e Movimento, Università di Verona                                                                                                         |
| Gallo Antonio          | Centro SM, I Clinica Neurologica, AOU-Policlinico, Università della Campania "Luigi Vanvitelli"                                                                                     |
| Gallo Paolo            | Multiple Sclerosis Centre of the Veneto Region (CeSMuV), University Hospital of Padua, Italy.                                                                                       |
| Gasperini Claudio      | Dept Neurosciences, San Camillo Forlanini Hospital - Rome                                                                                                                           |
| Ghazaryan Anna         | UO Neurologia                                                                                                                                                                       |
| Giometto Bruno         | Ospedale Santa Chiara, Trento. UO Neurologia (Trento)                                                                                                                               |
| Gobbin Francesca       | Dipartimento di Neuroscienze, Biomedicina e Movimento, Università di Verona                                                                                                         |
| Govone Flora           | Department of Neurology, Regina Montis Regalis Hospital, Mondovì (CN)                                                                                                               |
| Granella Franco        | Unit of Neurosciences, Department of Medicine and Surgery, University of Parma, Parma & Multiple Sclerosis Centre, Department of General Medicine, Parma University Hospital, Parma |
| Grange Erica           | Dept. of Rehabilitation, CRRF "Mons. Luigi Novarese", Moncrivello, Italy                                                                                                            |
| Grasso Maria Grazia    | IRCCS Fondazione Santa Lucia                                                                                                                                                        |
| Grimaldi Luigi M.E.    | U.O.C. Neurologia e Centro SM. Fondazione Istituto G. Giglio, Cefalù (PA)                                                                                                           |
| Guareschi Angelica     | Centro SM Fidenza (PR)                                                                                                                                                              |
| Guaschino Clara        | Centro Sclerosi Multipla Ospedale di Gallarate, ASST della Valle Olona                                                                                                              |
| Guerrieri Simone       | Neurology Department, Multiple Sclerosis Center, San Raffaele Hospital, Milan                                                                                                       |
| Guidetti Donata        | Emergency Department, Guglielmo da Saliceto Hospital, Piacenza, Italy                                                                                                               |
| Juergenson Ina Barbara | Division of Neurology, university Hospital, Verona, Italy                                                                                                                           |
| Iaffaldano Pietro      | Department of Basic Medical Sciences, Neurosciences and Sense Organs - University of Bari Aldo Moro                                                                                 |
| Ianniello Antonio      | Centro SM S.Andrea Dip. Neuroscienze Umane Sapienza Roma                                                                                                                            |
| Iasevoli Luigi         | IRCCS Fondazione Santa Lucia                                                                                                                                                        |
| Immovilli Paolo        | Emergency Department, Guglielmo da Saliceto Hospital, Piacenza, Italy                                                                                                               |
| Imperiale Daniele      | SC Neurologia1 Ospedale Maria Vittoria- Torino                                                                                                                                      |
| Infante Maria Teresa   | Neurologia ASL 1 imperiese                                                                                                                                                          |
| Inglese Matilde        | DINOEMI Università di Genova                                                                                                                                                        |
| Iodice Rosa            | Department of Neuroscience, Reproductive Sciences and Odontostomatology, University Federico II of Naples, Naples, Italy                                                            |
| Iovino Aniello         | Department of Advanced Biomedical Sciences, University Federico II, Naples, Italy                                                                                                   |
| Konrad Giovanna        | AIMS Aosta Rehabilitation Service                                                                                                                                                   |
| Landi Doriana          | Multiple Sclerosis Clinical and Research Unit, Department of Systems Medicine, Tor Vergata University, Rome, Italy                                                                  |
| Lanzillo Roberta       | Federico II University of Naples                                                                                                                                                    |
| Lapucci Caterina       | DINOEMI Università di Genova                                                                                                                                                        |
| Lavorgna Luigi         | Department of Advanced Medical and Surgical Sciences, University of Campania Luigi Vanvitelli, 80138 Naples, Italy;                                                                 |
| L'Episcopo Maria Rita  | Centro Sclerosi Multipla ospedale San Lazzaro (Alba, CN)                                                                                                                            |
| Leva Serena            | Centro Sclerosi Multipla, Ospedale di Legnano, ASST OVEST MI, Italia                                                                                                                |
| Liberatore Giuseppe    | Neuromuscular and Neuroimmunology Service, IRCCS Humanitas Clinical and Research Institute, Rozzano, Milan, Italy                                                                   |
| Lo Re Marianna         | SCDO Neurologia e Centro di Riferimento Regionale Sclerosi Multipla, AOU San Luigi - Orbassano (TO)                                                                                 |

MuSC study group

|                        |                                                                                                                                              |
|------------------------|----------------------------------------------------------------------------------------------------------------------------------------------|
| Longoni Marco          | Local Health Agency of Romagna, Maurizio Bufalini Hospital (Cesena) - Neurology Unit                                                         |
| Lopiano Leonardo       | Neurology II, Dept of Neuroscience, University of Turin                                                                                      |
| Lorefice Lorena        | Centro Sclerosi Multipla, ATS Sardegna/ Dpt Scienze Mediche e Sanità Pubblica, Università di Cagliari, Cagliari                              |
| Lucchini Matteo        | Fondazione Policlinico Universitario Agostino Gemelli IRCCS - Università Cattolica del Sacro Cuore                                           |
| Lus Giacomo            | Il Clinica Neurologica, Università della Campania Luigi Vanvitelli, Naples                                                                   |
| Maimone Davide         | Centro SM - UOC Neurologia - ARNAS Garibaldi - Catania                                                                                       |
| Malentacchi Maria      | SCDO Neurologia e Centro di Riferimento Regionale Sclerosi Multipla, AOU San Luigi - Orbassano (TO)                                          |
| Mallucci Giulia        | IRCCS Mondino Foundation, Pavia                                                                                                              |
| Malucchi Simona        | SCDO Neurologia e Centro di Riferimento Regionale Sclerosi Multipla, AOU San Luigi - Orbassano (TO)                                          |
| Mancinelli Chiara Rosa | Centro Sclerosi Multipla ASST Spedali Civili di Brescia, Ospedale di Montichiari                                                             |
| Mancinelli Luca        | Local Health Agency of Romagna, Maurizio Bufalini Hospital (Cesena) - Neurology Unit                                                         |
| Manganotti Paolo       | Neurology Unit, Department of Medical, Surgical, and Health Sciences, Cattinara University Hospital, ASUGI, Trieste                          |
| Maniscalco Giorgia     | Multiple Sclerosis Centre "A. Cardarelli Hospital", Naples, Italy                                                                            |
| Teresa                 | Neurological Clinic and Stroke Unit "A. Cardarelli Hospital", Naples, Italy;                                                                 |
| Mantero Vittorio       | MS Center, ASST Lecco                                                                                                                        |
| Marangoni Sabrina      | Ospedale Santa Chiara, Trento. UO Neurologia (Trento)                                                                                        |
| Marastoni Damiano      | The Multiple Sclerosis Center of University Hospital of Verona Dept. of Neuroscience, Biomedicine and Movements                              |
| Marfia Girolama        | Multiple Sclerosis Clinical and Research Unit, Department of Systems Medicine, Tor Vergata University, Rome, Italy                           |
| Alessandra             | Unit of Neurology, IRCCS Istituto Neurologico Mediterraneo NEUROMED, Pozzilli, IS, Italy                                                     |
| Marinelli Fabiana      | Ospedale Fabrizio Spaziani Frosinone<br>Asl Frosinone                                                                                        |
| Marti Alessandro       | UOC Neurologia- centro SM Reggio Emilia- AUSL-IRCSS RE                                                                                       |
| Martinelli Boneschi    | 1. IRCCS Fondazione Ca' Granda Ospedale Maggiore Policlinico, Neurology Unit, Milan, Italy. Via Francesco Sforza 35, 20122                   |
| Filippo                | 2. Dino Ferrari Center, Department of Pathophysiology and Transplantation, University of Milan, Milan, Italy. Via Francesco Sforza 35, 20122 |
| Masserano Zoli         | AIMS Padova Rehabilitation Service                                                                                                           |
| Federco                |                                                                                                                                              |
| Matta Francesca        | Centro SM - UOC Neurologia - ARNAS Garibaldi - Catania                                                                                       |
| Mendozzi Laura         | IRCCS Fondazione Don Carlo Gnocchi ONLUS, Milano                                                                                             |
| Meucci Giuseppe        | UO Neurologia Livorno                                                                                                                        |
| Miante Silvia          | Multiple Sclerosis Centre of the Veneto Region (CeSMuV), University Hospital of Padua, Italy.                                                |
| Miele Giuseppina       | Department of Advanced Medical and Surgical Sciences, University of Campania Luigi Vanvitelli, 80138 Naples, Italy;                          |
| Milano Eva             | SC Neurologia1 Ospedale Maria Vittoria- Torino                                                                                               |
| Mirabella Massimiliano | Fondazione Policlinico Universitario Agostino Gemelli IRCCS - Università Cattolica del Sacro Cuore                                           |
| Missione Rosanna       | Il Clinica Neurologica, Università della Campania Luigi Vanvitelli, Naples                                                                   |

MuSC study group

|                          |                                                                                                                                                                                                                         |
|--------------------------|-------------------------------------------------------------------------------------------------------------------------------------------------------------------------------------------------------------------------|
| Moccia Marcello          | Federico II University of Naples                                                                                                                                                                                        |
| Moiola Lucia             | Neurology Unit, IRCCS San Raffaele Scientific Institute, Milan, Italy                                                                                                                                                   |
| Montepietra Sara         | Responsabile del Centro Sclerosi Multipla - Reggio Emilia- UOC Neurologia- AUSL-IRCSS RE                                                                                                                                |
| MontiBragadin Margherita | AIMS Rehabilitation Service Liguria                                                                                                                                                                                     |
| Montini Federico         | Neurology Unit, IRCCS San Raffaele Scientific Institute, Milan, Italy                                                                                                                                                   |
| Motta Roberta            | AIMS Rehabilitation Service Liguria                                                                                                                                                                                     |
| Nardone Raffaele         | 1. Paracelsus Medical University, Department of Neurology, Salisburgo, AU<br>2. Department of Neurology - Franz Tappeiner Hospital Meran (BZ), Italy                                                                    |
| Nicoletti Carolina Gabri | Multiple Sclerosis Clinical and Research Unit, Department of Systems Medicine, Tor Vergata University, Rome, Italy                                                                                                      |
| Nobile-Orazio Eduardo    | 1)Neuromuscular and Neuroimmunology Service, IRCCS Humanitas Clinical and Research Institute, Rozzano, Milan, Italy<br>2)Department of Medical Biotechnology and Translational Medicine, Milan University, Milan, Italy |
| Nozzolillo Agostino      | Neurology Unit, IRCCS San Raffaele Scientific Institute, Milan, Italy                                                                                                                                                   |
| Onofrj Marco             | Department of Neurosciences, Imaging and Clinical Sciences, University G. d'Annunzio of Chieti-Pescara, Chieti, Italy                                                                                                   |
| Orlandi Riccardo         | Dipartimento di Neuroscienze, Biomedicina e Movimento, Università di Verona                                                                                                                                             |
| Palmieri Anna            | UO Neurologia, Treviso                                                                                                                                                                                                  |
| Paolicelli Damiano       | Department of Basic Medical Sciences, Neurosciences and Sense Organs - University of Bari Aldo Moro                                                                                                                     |
| Pasquali Livia           | Department of Clinical and Experimental Medicine, Neurology Unit, University of Pisa, Pisa, Italy                                                                                                                       |
| Pasquin Fulvio           | Neurology Unit, Department of Medical, Surgical, and Health Sciences, Cattinara University Hospital, ASUGI, Trieste                                                                                                     |
| Pastò Luisa              | Azienda Ospedaliero Universitaria Careggi, Firenze                                                                                                                                                                      |
| Patti Francesco          | Dipartimento Scienze Mediche e Chirurgiche e Tecnologie Avanzate, GF Ingrassia, Università di Catania; Centro Sclerosi Multipla Policlinico "G Rodolico"- San Marco, Università di Catania                              |
| Pedrazzoli Elisabetta    | AIMS Padova Rehabilitation Service                                                                                                                                                                                      |
| Perini Paola             | Multiple Sclerosis Centre of the Veneto Region (CeSMuV), University Hospital of Padua, Italy.                                                                                                                           |
| Pesci Ilaria             | Responsabile Centro SM Fidenza (PR)                                                                                                                                                                                     |
| Petracca Maria           | Federico II University of Naples                                                                                                                                                                                        |
| Petrone Alfredo          | Ospedale Annunziata (Cosenza)                                                                                                                                                                                           |
| Piantadosi Carlo         | UOC Neurologia - Azienda Ospedaliera "San Giovanni-Addolorata" - Roma                                                                                                                                                   |
| Pietroboni Anna M.       | 1. Fondazione IRCCS Ca' Granda Ospedale Maggiore Policlinico, Milan, IT.<br>2. University of Milan, Dino Ferrari Center, Milan, IT.                                                                                     |
| Pinardi Federica         | IRCCS Istituto delle Scienze Neurologiche di Bologna, UOSI Riabilitazione Sclerosi Multipla                                                                                                                             |
| Ponzano Marta            | Department of Health Sciences, University of Genoa, Genoa, Italy.                                                                                                                                                       |
| Portaccio Emilio         | Università degli Studi di Firenze, Dipartimento NEUROFARBA, Firenze                                                                                                                                                     |
| Pozzato Mattia           | 1. IRCCS Fondazione Ca' Granda Ospedale Maggiore Policlinico, Neurology Unit, Milan, Italy. Via Francesco Sforza 35, 20122                                                                                              |

MuSC study group

2. Dino Ferrari Center, Department of Pathophysiology and Transplantation, University of Milan, Milan, Italy. Via Francesco Sforza 35, 20122

|                             |                                                                                                                                                                       |
|-----------------------------|-----------------------------------------------------------------------------------------------------------------------------------------------------------------------|
| Pozzilli Carlo              | Centro SM S.Andrea Dip.Neuroscienze Umane Sapienza Roma                                                                                                               |
| Prosperini Luca             | Dept Neurosciences, San Camillo Forlanini Hospital - Rome                                                                                                             |
| Protti Alessandra           | ASST GOM NIGUARDA, DIPARTIMENTO NEUROSCIENZE                                                                                                                          |
| Pucci Eugenio               | UOC Neurologia - Ospedale "A. Murri" - Fermo                                                                                                                          |
| Radaelli Marta              | USS Neuroimmunologia, ASST Papa Giovanni XXIII                                                                                                                        |
| Ragonese Paolo              | Department of Biomedicine, Neurosciences and Advanced Diagnostics; University of Palermo                                                                              |
| Rasia Sarah                 | Centro Sclerosi Multipla ASST Spedali Civili di Brescia, Ospedale di Montichiari                                                                                      |
| Realmuto Sabrina            | Centro Sclerosi Multipla, UOC di Neurologia e Stroke Unit, AOOR Villa Sofia-Cervello Palermo                                                                          |
| Repice Anna                 | Azienda Ospedaliera Universitaria Careggi Firenze                                                                                                                     |
| Rigoni Eleonora             | IRCCS Mondino Foundation, Pavia                                                                                                                                       |
| Rilla Maria Teresa          | Asl1 Imperia, Neurologia                                                                                                                                              |
| Rinaldi Francesca           | Multiple Sclerosis Centre of the Veneto Region (CeSMuV), University Hospital of Padua, Italy.                                                                         |
| Romano Calogero<br>Marcello | Centro Sclerosi Multipla, UOC di Neurologia e Stroke Unit, AOOR Villa Sofia-Cervello Palermo                                                                          |
| Ronzoni Marco               | ASST Rhodense                                                                                                                                                         |
| Rovaris Marco               | IRCCS Fondazione Don Carlo Gnocchi ONLUS, Milano                                                                                                                      |
| Ruscica Francesca           | U.O.C. Neurologia e Centro SM. Fondazione Istituto G. Giglio, Cefalù (PA)                                                                                             |
| Sabattini Loredana          | IRCCS Istituto delle Scienze Neurologiche di Bologna, UOSI Riabilitazione Sclerosi Multipla                                                                           |
| Salemi Giuseppe             | Department of Biomedicine, Neurosciences and advanced Diagnostics; University of Palermo                                                                              |
| Salvetti Marco              | 1. Department of Neuroscience, Mental Health, and Sensory Organs, Sapienza University of Rome, Rome, Italy.<br>2. Unit of Neurology, IRCCS Neuromed, Pozzilli, Italy. |
| Saraceno Lorenzo            | ASST GOM NIGUARDA, DIPARTIMENTO NEUROSCIENZE                                                                                                                          |
| Sartori Alessia             | Department of Pharmacy, Ospedale Guglielmo da Saliceto, Piacenza , Italy                                                                                              |
| Sartori Arianna             | Neurology Unit, Department of Medical, Surgical, and Health Sciences, Cattinara University Hospital, ASUGI, Trieste                                                   |
| Sbragia Elvira              | DINOEMI Università' di Genova                                                                                                                                         |
| Scandellari Cinzia          | IRCCS Istituto delle Scienze Neurologiche di Bologna, UOSI Riabilitazione Sclerosi Multipla                                                                           |
| Scarano Giuditta Ilaria     | Departement of Psychology, Franz Tappeiner Hospital, Merano, Italy                                                                                                    |
| Scarano Valentina           | UOC Neurologia e Stroke AORN San Giuseppe Moscati Avellino                                                                                                            |
| Schiavetti Irene            | Department of Health Sciences, University of Genoa, Genoa, Italy.                                                                                                     |
| Sessa Maria                 | UOC Neurologia, USS Neuroimmunologia, ASST Papa Giovanni XXIII                                                                                                        |
| Sgarito Caterina            | AIMS Como Rehabilitation Service                                                                                                                                      |
| Sibilia Grazia              | NEUROLOGY UNIT AND MS CENTER, ASL NAPOLI 1 CENTRO, NAPLES, ITALY                                                                                                      |
| Siciliano Gabriele          | Department of Clinical and Experimental Medicine, Neurology Unit, University of Pisa, Pisa, Italy                                                                     |
| Signori Alessio             | Department of Health Sciences, University of Genoa, Genoa, Italy.                                                                                                     |
| Signoriello Elisabetta      | Il Clinica Neurologica, Università della Campania Luigi Vanvitelli, Naples                                                                                            |
| Sinisi Leonardo             | NEUROLOGY UNIT AND MS CENTER, ASL NAPOLI 1 CENTRO, NAPLES, ITALY                                                                                                      |
| Sireci Francesca            | UOC Neurologia- centro SM Reggio Emilia- AUSL-IRCCS RE                                                                                                                |

MuSC study group

|                          |                                                                                                                                                                                                                                                                                      |
|--------------------------|--------------------------------------------------------------------------------------------------------------------------------------------------------------------------------------------------------------------------------------------------------------------------------------|
| Sola Patrizia            | Neurology Unit, Ospedale Civile, Azienda Ospedaliero-Universitaria di Modena, Modena, Italy                                                                                                                                                                                          |
| Solaro Claudio           | Dept. of Rehabilitation, CRRF "Mons. Luigi Novarese", Moncrivello, Italy                                                                                                                                                                                                             |
| Sormani Maria Pia        | 1. Department of Health Sciences, University of Genoa, Genoa, Italy.<br>2. IRCCS Ospedale Policlinico San Martino, Genoa, Italy.                                                                                                                                                     |
| Sotgiu Stefano           | Dipartimento di Scienze Mediche, Chirurgiche e Sperimentali - Università di Sassari                                                                                                                                                                                                  |
| Sparaco Maddalena        | Department of Advanced Medical and Surgical Sciences, University of Campania Luigi Vanvitelli, 80138 Naples, Italy;                                                                                                                                                                  |
| Stromillo Maria Laura    | Department of Medicine, Surgery and Neuroscience, University of Siena, Italy                                                                                                                                                                                                         |
| Strumia Silvia           | MS center, Neurology Unit, Morgagni-Pierantoni Hospital, Forlì                                                                                                                                                                                                                       |
| Susani Emanuela Laura    | ASST GOM NIGUARDA, DIPARTIMENTO NEUROSCIENZE                                                                                                                                                                                                                                         |
| Tabiaddon Giulietta      | Multiple Sclerosis Outpt.Clinic, Clinical Neurology and Stroke Unit Dep., Central Country Hospital, Bolzano, Italy                                                                                                                                                                   |
| Teatini Francesco        | Multiple Sclerosis Outpt.Clinic, Clinical Neurology and Stroke Unit Dep., Central Country Hospital, Bolzano, Italy                                                                                                                                                                   |
| Tedeschi Gioacchino      | Department of Advanced Medical and Surgical Sciences, University of Campania, Naples, Italy.                                                                                                                                                                                         |
| Tomassini Valentina      | 1. Institute for Advanced Biomedical Technologies (ITAB), Department of Neurosciences, Imaging and Clinical Sciences, University G. d'Annunzio of Chieti-Pescara, Chieti, Italy<br>2. MS Centre, Department of Clinical Neurology, SS. Annunziata University Hospital, Chieti, Italy |
| Tonietti Simone          | Centro Sclerosi Multipla Ospedale San Carlo Borromeo (Milano)                                                                                                                                                                                                                        |
| Torri Clerici Valentina  | Centro Sclerosi Multipla, U.O Neurologia IV, Fondazione IRCCS Istituto Neurologico "Carlo Besta", Milano                                                                                                                                                                             |
| Tortorella Carla         | Dept Neurosciences, San Camillo Forlanini Hospital - Rome                                                                                                                                                                                                                            |
| Toscano Simona           | Dipartimento Scienze Mediche e Chirurgiche e Tecnologie Avanzate, GF Ingrassia, Università di Catania; Centro Sclerosi Multipla Policlinico "G Rodolico"- San Marco, Università di Catania                                                                                           |
| Totaro Rocco             | Demyelinating Disease Center, San Salvatore Hospital, L'Aquila                                                                                                                                                                                                                       |
| Trojano Maria            | Department of Basic Medical Sciences, Neurosciences and Sense Organs - University of Bari Aldo Moro                                                                                                                                                                                  |
| Trotta Maria             | Ospedale Annunziata (Cosenza)                                                                                                                                                                                                                                                        |
| Turano Gabriella         | Department of Neurology, Regina Montis Regalis Hospital, Mondovì (CN)                                                                                                                                                                                                                |
| Ulivelli Monica          | Department of Medicine, Surgery and Neuroscience, University of Siena, Siena, Italy                                                                                                                                                                                                  |
| Valentino Manzo          | Neurological Clinic and Stroke Unit "A. Cardarelli Hospital", Naples, Italy;                                                                                                                                                                                                         |
| Vaula Giovanna           | Neurology II, AOU Città della Salute e della Scienza -Turin                                                                                                                                                                                                                          |
| Vecchio Domizia          | Neurology Unit, Maggiore della Carità Hospital, Department of Translational Medicine, University of Piemonte Orientale, Novara, Italy                                                                                                                                                |
| Vercellino Marco         | MS Center, Department of Neuroscience, City of Health and Science University Hospital of Turin, Turin, Italy                                                                                                                                                                         |
| Verrengia Elena Pinuccia | Centro Sclerosi Multipla, Ospedale di Legnano, ASST OVEST MI, Italia                                                                                                                                                                                                                 |
| Vianello Marika          | UO Neurologia, Treviso                                                                                                                                                                                                                                                               |
| Virgilio Eleonora        | Neurology Unit, Maggiore della Carità Hospital, Department of Translational Medicine, University of Piemonte Orientale, Novara, Italy                                                                                                                                                |
| Vitetta Francesca        | Neurology Unit, Ospedale Civile, Azienda Ospedaliero-Universitaria di Modena, Modena, Italy                                                                                                                                                                                          |



MuSC study group

|                       |                                                                                     |
|-----------------------|-------------------------------------------------------------------------------------|
| Vollaro Stefano       | Emergency Department, Guglielmo da Saliceto Hospital, Piacenza, Italy               |
| Zaffaroni Mauro       | Centro Sclerosi Multipla Ospedale di Gallarate, ASST della Valle Olona              |
| Zampolini Mauro       | Neurologia, Ospedale San Giovanni, Foligno                                          |
| Zarbo Ignazio Roberto | Dipartimento di Scienze Mediche, Chirurgiche e Sperimentali - Università di Sassari |
| Zito Antonio          | IRCCS Mondino Foundation, Pavia                                                     |
| Zuliani Luigi         | Department of Neurology - Ospedale San Bortolo - AULSS8 Berica Vicenza              |
